# Supplementary material for: C1-INH and the Contact System in COVID-19-Associated Coagulopathy
Source: Preprints.org preprint supplement (doi:10.20944/preprints202005.0262.v1), 2020-05-16
Supplement: Supplementary file 1 [file supplementary]

# C1NH (SERPING1) and the contact system in COVID-19-associated coagulopathy

## Supplementary Figures

Here we present the pairwise protein alignments performed with Geneious Prime software using MUSCLE program. The sequences were obtained from the NCBI GenBank, accession numbers NC\_045512.2 and NC\_004718.3 (SARS-CoV2 and SARS-CoV2, respectively). The translation was performed using BENCHLING platform.

### NSP2 (Non-structural protein 2, p65 homolog)

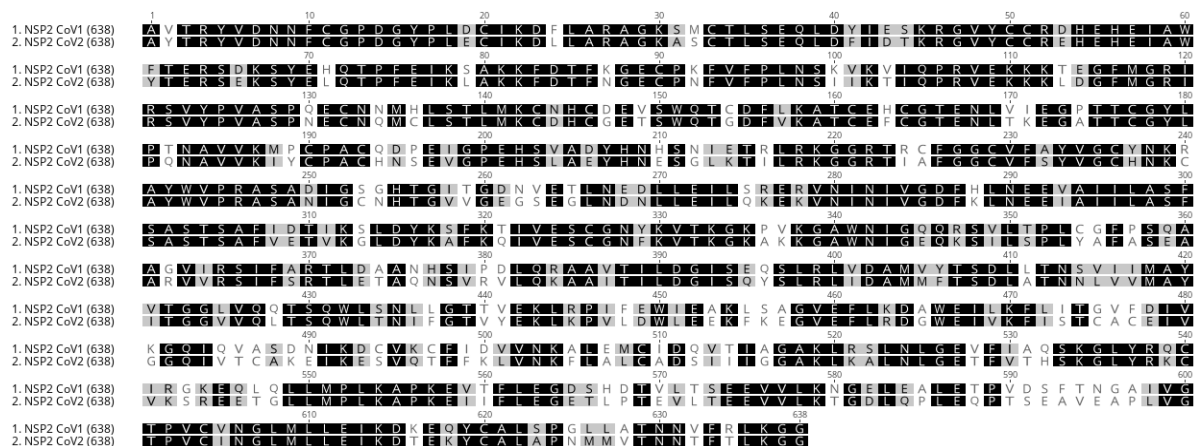

### NSP8 (Non-structural protein 8)

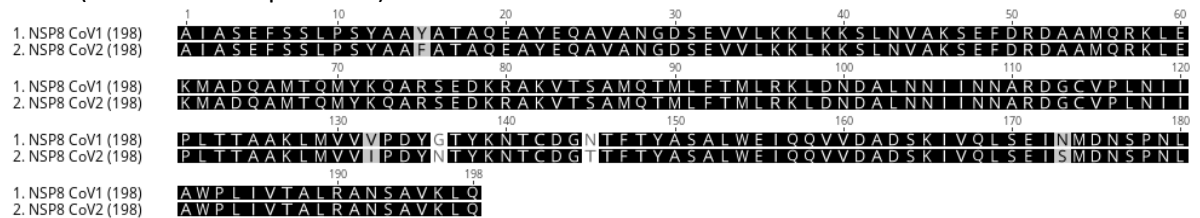

### NSP13 (NTPase/Helicase)

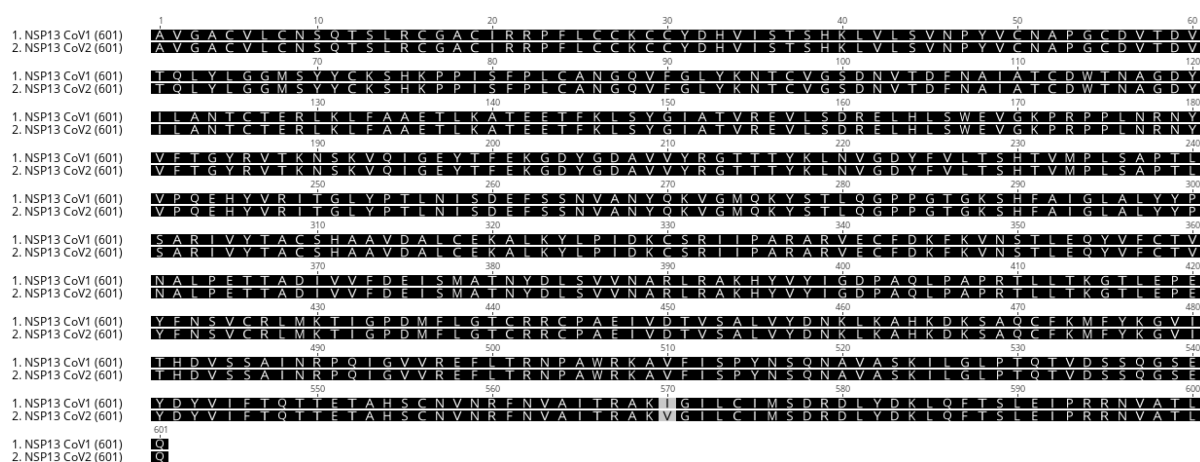

## NSP14 (Non- structural protein 14, Guanine N7 methyltransferase)

1. NSP14 CoV1 (527) AENVTGLFKDCSKIIITGLHPTQAPTHLSVDIKFKTEGLCVDIPGIPKDMTYRRLISMMGF  
 2. NSP14 CoV2 (528) AENVTGLFKDCSKVIITGLHPTQAPTHLSVDIKFKTEGLCVDIPGIPKDMTYRRLISMMGF

1. NSP14 CoV1 (527) KMNYQVNGYPNMFITREEAIRHVRAWIGFDVEGCHATRDAVGTNLPLOLGFSTGVNLVAV  
 2. NSP14 CoV2 (528) KMNYQVNGYPNMFITREEAIRHVRAWIGFDVEGCHATRDAVGTNLPLOLGFSTGVNLVAV

1. NSP14 CoV1 (527) PTGYVDTEENNTDFTRVNAKPPPGDQFKHLLPLMYKGLPWNVVRKIQVQLSDTLKGLSDR  
 2. NSP14 CoV2 (528) PTGYVDTEENNTDFSRVSAKPPPGDQFKHLLPLMYKGLPWNVVRKIQVQLSDTLKGLSDR

1. NSP14 CoV1 (527) VVFVWLWAHGFELTSMKYFVKIGPERTCCLCDKRATCFSTISSDTYACWNHSSVGFQVYVNP  
 2. NSP14 CoV2 (528) VVFVWLWAHGFELTSMKYFVKIGPERTCCLCDKRATCFSTIASDITYACWNHSSVGFQVYVNP

1. NSP14 CoV1 (527) MIDVQQWGFITGNLQSNHDLHCQVHGNAHVASCDAIMTRCLAVHECFVKRVDWVIEYPTIG  
 2. NSP14 CoV2 (528) MIDVQQWGFITGNLQSNHDLHCQVHGNAHVASCDAIMTRCLAVHECFVKRVDWVIEYPTIG

1. NSP14 CoV1 (527) DELRVNSIACRKLQVHMVVKSAALLADKFPVLHDIGNPKAIKCVPOAEVFWKFFYDAQPCSDKA  
 2. NSP14 CoV2 (528) DELKINAIACRKLQVHMVVKSAALLADKFPVLHDIGNPKAIKCVPOAEVFWKFFYDAQPCSDKA

1. NSP14 CoV1 (527) YKIEELFYSYATHHDKFTDGVCLF-WNCNVD RY PANAI VCRFDTRVLSNINLPGCDGGS  
 2. NSP14 CoV2 (528) YKIEELFYSYATHHDKFTDGVCLFKWNCNVD RY PANASIVCRFDTRVLSNINLPGCDGGS

1. NSP14 CoV1 (527) YVNKHAFHTPAFDKSAFVNLKQLPFFYYSDSPCESHGKQVVSDDIYVPLKSATCITRCNL  
 2. NSP14 CoV2 (528) YVNKHAFHTPAFDKSAFVNLKQLPFFYYSDSPCESHGKQVVSDDIYVPLKSATCITRCNL

1. NSP14 CoV1 (527) GGA VCRHHANEYRQYLDAYNMMISAGFSLWVYKQFDTYNLWNTFTRLQ  
 2. NSP14 CoV2 (528) GGA VCRHHANEYRLYLDAYNMMISAGFSLWVYKQFDTYNLWNTFTRLQ

## ORF3b (3b protein)

1. ORF3b CoV1 (154) MMPTTLFAGTHITMTIVYHITIVSQIQLSLKVTAFOHQNSKKTTKLVLVILRIGTQVLLKTM  
 2. ORF3b CoV2 (131) MMPTLFFAGILIVTTIVYHITIVLQLSLQVMAQQVLF LNMTRLVVLKNGN--LEKT

1. ORF3b CoV1 (154) SLYMAISPKFITSLSLHKLLLOTLVLMHSSSLTSLLLKTHR-MCKYTOSTALQELLIQW  
 2. ORF3b CoV2 (131) VLYYTVTSLQITISCTQLNVTLLVLMHSSSTIKLLMSLKNMSKFTOSTIVHPELLIQW

1. ORF3b CoV1 (154) IQFMMSRRRLACLCKHKKVSTNLC THSFRKKQVR  
 2. ORF3b CoV2 (131) IQFMNRRRLLACLCK

## ORF7b (7b protein)

1. ORF7b CoV1 (45) MNELTLIDFYLCFLAFLLFLVLMILIFWFSLEIQDL EEPCTKV\*  
 2. ORF7b CoV2 (43) MI ELSLIDFYLCFLAFLLFLVLMILIFWFSLEIQDHNETCHA

## ORF14 (Uncharacterized protein 14)

1. ORF14 CoV1 (70) MLPPCYNFLKEQHCQKASTQREAEAAVKPPLLAPHHVAVIQEIQLLA AVGEILLLEWLA E  
 2. ORF14 CoV2 (73) MLQSCYNFLKEQHCQKASTQKGA EAAVKPPLLPHHVAVTMEIQQLQA AVGEILLLEWLA M

1. ORF14 CoV1 (70) VMKIPSR YCC  
 2. ORF14 CoV2 (73) AVMLLLLCCLTD
